# Supplementary material
Source: PubMed Central journal article supplement (PMC7927824)
Supplement: AAC.00865-20-s0001.pdf [file AAC.00865-20-s0001.pdf]

## 1 SUPPLEMENTARY MATERIAL

### 2 METHODS

3 ***Bacterial strains, chemicals, and media used.*** The *E. coli* clinical isolates included  
4 here were obtained from the CANWARD collection (1). Between 2007 and 2016, ten  
5 fosfomycin-resistant *E. coli* were identified. The three *E. coli* isolates (two from urine and one  
6 from blood; EC623771-EC623773) with a fosfomycin MIC of >512 µg/ml were selected for  
7 further evaluation, as described below.

8 The strains and plasmids used in this study are listed in **Table 1**. *E. coli* K12 BW25113  
9 was obtained from the Coli Genetic Stock Centre (Yale University, CT, USA) (2). Strains were  
10 grown at 37°C in Luria–Bertani (LB) broth with aeration at 170 rpm, LB agar plates, or Mueller–  
11 Hinton (MH) agar plates. Ampicillin was included in all LB and MH media at a final  
12 concentration of 100 µg/ml to maintain transformed plasmids. Cloned *fosA* gene expression  
13 from transformed plasmids was induced with IPTG at a final concentration of 0.1 mM in LB and  
14 1 mM in MH broth. Ampicillin was purchased from VWR (Radnor, PA, USA). IPTG was  
15 purchased from Cedarlane (Burlington, ON, Canada). Fosfomycin analytical grade powder was  
16 supplied by Paladin Labs (Montreal, QC, Canada).

17 ***Clinical isolate whole genome sequencing.*** Whole genome sequencing of the three  
18 fosfomycin–resistant *E. coli* isolates was performed on an Illumina MiSeq system. DNA  
19 libraries were prepared with Nextera XT reagents and then sequenced using V2 chemistry.  
20 Sequencing data has been deposited in GenBank as BioProject PRJNA511988. The  
21 accession numbers for *E. coli* strains EC623771 (*fosA3*), EC623772 (*fosA7.5<sup>Q86E</sup>*), and  
22 EC623773 (*fosA8*) are SAMN13659120, SAMN13659121, and SAMN13659122, respectively.  
23 Genome assembly and annotation were performed with the Integrated Rapid Infectious

24 Disease Analysis (IRIDA) platform (version 19.09) (3). Briefly, this pipeline combines Shovill  
25 assembly, with Prokka annotation and QUAST assembly assessment. Resequencing of *E. coli*  
26 EC623772 was performed on a MinION Mk1b system (Oxford Nanopore Technologies; ONT).  
27 The sequencing library was prepared with the ONT Ligation Sequencing Kit using genomic  
28 DNA that has been sheared to a mean fragment size of 8 kb with a gTube (Covaris, Inc). The  
29 sequencing run used a FLO-MIN106D flow cell (pore version R9.4.1) and MinKNOW software  
30 (release 19.12.5). Base calling was performed with Guppy (version 3.2.10). Flye (v.2.8.1) was  
31 used for read assembly and yielded 11 contigs, including the  $\approx 103$  kb closed circular plasmid  
32 sequence containing the *fosA7.5*<sup>Q86E</sup> allele (4).

33 ***FosA sequence sources.*** The *fosA* reference sequences used in this study were  
34 obtained from published literature and public databases, including NCBI's Bacterial  
35 Antimicrobial Resistance Reference Gene Database (BioProject PRJNA313047) and the  
36 Comprehensive Antibiotic Resistance Database (CARD; <https://card.mcmaster.ca/>). The list of  
37 sequences and sources is summarized in **Table S2**. Multiple approaches were used to identify  
38 *fosA* alleles in the EC623771, EC623772, and EC623773 datasets. Sequences were analyzed  
39 by ResFinder on the Center for Genomic Epidemiology website  
40 (<https://cge.cbs.dtu.dk/services/>), annotated contigs were reviewed for genes labelled '*fosA*' or  
41 'glutathione transferase', and contig sequences were compared to a reference set of *fosA*  
42 sequences using Geneious (version 7, Biomatters Ltd., Auckland New Zealand).

43 ***Construction of strains and plasmids.*** Synthesis and cloning of *fos* genes into the  
44 expression plasmid pMS119EH was performed using Bio Basic Inc. Gene Synthesis services  
45 (Markham, ON, Canada). The ampicillin-resistant *Ptac* expression plasmid pMS119EH (5)  
46 was used as the parental vector for all constructs. Each *fos* gene was synthesized with an in-

47 frame C-terminal hexahistidine affinity tag (His<sub>6</sub>-tag) according to the sequences listed in  
48 **Figure S4**. All *fos* genes were cloned into the pMS119EH multiple cloning site at 5' EcoRI and  
49 3' XbaI cut sites and all gene sequences were verified by Sanger sequencing. Plasmids were  
50 transformed into *E. coli* BW25113 competent cells using standard protocols (6) and  
51 cryopreserved in LB with 20% dimethylsulfoxide.

52 **SDS-Tricine-PAGE and Western Blotting.** Overnight (16 h) cultures of *E. coli*  
53 transformants grown in LB broth with ampicillin were standardized to 1.0 absorbance units  
54 (OD<sub>600</sub>), then 50 µL of cells was used to inoculate 5 ml LB broth with ampicillin, and cultures  
55 were incubated at 37°C until reaching 0.5 absorbance units. IPTG was added at a final  
56 concentration of 0.1 mM, and cultures were incubated at 25°C for another 3 hours. 2 ml of cells  
57 were harvested by centrifugation (15,000 x g, 1 min), re-suspended in 0.4 ml of 8 M urea  
58 buffer (100 mM NaH<sub>2</sub>PO<sub>4</sub>, 10 mM Tris, 8M urea, pH 8.0) and vortexed briefly. The  
59 supernatants were recovered after centrifugation at 15,000 x g, for 10 min. Protein  
60 concentration from supernatants was determined using a modified Lowry protein assay (7). 10  
61 µL of protein extracts (10 µg) were separated using 12% sodium dodecylsulfate (SDS)-Tricine  
62 polyacrylamide gel electrophoresis (PAGE), and visualized with ultraviolet (UV) light using  
63 0.5% 2,2,2-trichloroethanol (TCE) (8), then transferred onto a nitrocellulose membrane using  
64 Western Blotting (9). The membrane was blocked for 1 h in Tris-buffered saline (20 mM Tris,  
65 500 mM NaCl, pH 7.5) containing 5% skim milk powder and washed in Tris-buffered saline  
66 containing 0.05% tween-20. Western blotted FosA-His<sub>6</sub> protein accumulation from total cell  
67 protein extracts was colorimetrically detected using an anti-Hexahistidine horseradish  
68 peroxidase (HRP)-conjugated antibody (Thermo Fisher Scientific) with the HRP conjugate  
69 substrate kit (Bio-Rad).

70 **Antimicrobial susceptibility testing.** *In vitro* susceptibility of *E. coli* transformants to  
71 fosfomicin was determined by CLSI agar dilution (10, 11), CLSI disk diffusion (11, 12), and  
72 Etest (bioMérieux, Marcy l'Etoile, France). Agar dilution plates contained doubling–dilutions of  
73 fosfomicin from 0.5 to 512 µg/ml (Mueller–Hinton agar supplemented with 25 µg/ml of  
74 glucose–6–phosphate) (10, 11); 200 µg fosfomicin disks (containing 50 µg of glucose–6–  
75 phosphate) (11, 12) and Etest were tested on Mueller–Hinton agar.

76 The Mueller–Hinton agar used to test transformants was supplemented with 100 µg/ml  
77 ampicillin (selection) and 1 mM IPTG to induce protein expression of genes under control of  
78 the *P<sub>tac</sub>* promotor. Inoculated agar plates were incubated in ambient air at 35°C ± 2°C for 16–  
79 18 h. Fosfomicin MICs were determined in triplicate for each transformant using each of the  
80 three susceptibility testing methods.

81 Agar dilution MICs and disk diffusion zone sizes were read following CLSI directives  
82 (11). Etest endpoints were read following manufacturer instructions. CLSI fosfomicin agar  
83 dilution MIC breakpoints (≤64 µg/ml = susceptible, 128 µg/ml = intermediate, ≥256 µg/ml =  
84 resistant) and disk diffusion zone size breakpoints (≥16 mm = susceptible, 13–15 mm =  
85 intermediate, ≤12 mm = resistant) were used to interpret the results of antimicrobial  
86 susceptibility testing. Quality control testing included ATCC strains *E. coli* 25922 and  
87 *Pseudomonas aeruginosa* 27853.

88 **Multiple sequence alignment and phylogenetic analysis.** Multiple sequence  
89 alignment and phylogenetic analysis of FosA protein sequences were performed with MEGA7  
90 (13). Dendrograms (**Figures 1A and 1B**) were constructed using the Neighbor-Joining method  
91 and confidence intervals were assigned using the interior branch test (500 replicates) (14, 15).

92 The sequence alignment of FosA proteins shown in **Figure 1C** was conducted used Clustal  
93 Omega (16) and visualized by Jalview version 2.10.5 software (17).

94 **Homology modelling of FosA protein sequences.** The crystal structure of FosA1  
95 (FosA<sup>Tn2921</sup>) from *Serratia marcescens* (PDB: 1nbp) was identified as the closest template  
96 based on the RMSD values ( $2.3 \pm 1.8 \text{ \AA}$  to  $2.6 \pm 2.0 \text{ \AA}$ ) and C–score values (ranging from 1.03  
97 to 1.19) for each FosA protein sequence using the I–TASSER homology modelling online  
98 webserver (18, 19). The overlapped superposition of all FosA homology model sequences  
99 generated by I–TASSER shown in **Figure S3**, was performed using PyMOL software version  
100 2.2.3 (20).

101

## 102 REFERENCES

- 103 1. Zhanel GG, Adam HJ, Baxter MR, Fuller J, Nichol KA, Denisuik AJ, Golden AR, Hink R,  
104 Lagacé-Wiens PRS, Walkty A, Mulvey MR, Schweizer F, Bay D, Hoban DJ, Karlowsky  
105 JA. 2019. 42936 pathogens from Canadian hospitals: 10 years of results (2007-16) from  
106 the CANWARD surveillance study. *J Antimicrob Chemother* 74:iv5–iv21.
- 107 2. Baba T, Ara T, Hasegawa M, Takai Y, Okumura Y, Baba M, Datsenko KA, Tomita M,  
108 Wanner BL, Mori H. 2006. Construction of *Escherichia coli* K-12 in-frame, single-gene  
109 knockout mutants: the Keio collection. *Mol Syst Biol* 2:1–11.
- 110 3. Matthews TC, Bristow FR, Griffiths EJ, Petkau A, Adam J, Dooley D, Kruczkiewicz P,  
111 Curatcha J, Cabral J, Fornika D, Winsor GL, Courtot M, Bertelli C, Roudgar A, Feijao P,  
112 Mabon P, Enns E, Thiessen J, Keddy A, Isaac-Renton J, Gardy JL, Tang P, The IRIDA  
113 Consortium, Carriço JA, Chindelevitch L, Chauve C, Graham MR, McArthur AG,  
114 Taboada EN, Beiko RG, Brinkman FS, Hsiao WW, Van Domselaar G. 2018. The  
115 Integrated Rapid Infectious Disease Analysis (IRIDA) platform. *BioRxiv* 1–34.
- 116 4. Kolmogorov M, Yuan J, Lin Y, Pevzner PA. 2019. Assembly of long, error-prone reads  
117 using repeat graphs. *Nat Biotechnol* 37:540–546.
- 118 5. Fürste JP, Pansegrau W, Frank R, Blöcker H, Scholz P, Bagdasarian M, Lanka E. 1986.  
119 Molecular cloning of the plasmid RP4 primase region in a multi-host-range *tacP*  
120 expression vector. *Gene* 48:119–131.
- 121 6. Green R, Rogers EJ. 2013. Chemical transformation of *E. coli*. *Methods Enzymol*  
122 529:329–336.
- 123 7. Lowry OH, Rosebrough NJ, Farr AL, Randall RJ. 1951. Protein measurement with the  
124 folin phenol reagent. *J Biol Chem* 193:265–275.
- 125 8. Bay DC, Turner RJ. 2012. Spectroscopic analysis of small multidrug resistance protein  
126 EmrE in the presence of various quaternary cation compounds. *Biochim Biophys Acta* -

- 127 Biomembr 1818:1318–1331.
- 128 9. Towbin H, Staehelin T, Gordon J. 1979. Electrophoretic transfer of proteins from  
129 polyacrylamide gels to nitrocellulose sheets: procedure and some applications. Proc Natl  
130 Acad Sci U S A 76:4350–4354.
- 131 10. Clinical and Laboratory Standards Institute. 2018. Methods for dilution antimicrobial  
132 susceptibility tests for bacteria that grow aerobically. M07, 11th edition. CLSI. Wayne,  
133 PA.
- 134 11. Clinical and Laboratory Standards Institute. 2019. Performance standards for  
135 antimicrobial susceptibility testing. M100, 29th edition. CLSI. Wayne, PA.
- 136 12. Clinical and Laboratory Standards Institute. 2018. Performance standards for  
137 antimicrobial disk susceptibility tests. M02, 13th edition. CLSI. Wayne, PA.
- 138 13. Kumar S, Stecher G, Tamura K. 2016. MEGA7: Molecular Evolutionary Genetics  
139 Analysis version 7.0 for bigger datasets. Mol Biol Evol 33:1870–1874.
- 140 14. Saitou N, Nei M. 1987. The neighbor-joining method: A new method for reconstructing  
141 phylogenetic trees. Mol Biol Evol 4:406–425.
- 142 15. Dopazo J. 1994. Estimating errors and confidence intervals for branch lengths in  
143 phylogenetics trees by a bootstrap approach. J Mol Evol 38:300–304.
- 144 16. Sievers F, Wilm A, Dineen D, Gibson TJ, Karplus K, Li W, Lopez R, McWilliam H,  
145 Remmert M, Söding J, Thompson JD, Higgins DG. 2011. Fast, scalable generation of  
146 high-quality protein multiple sequence alignments using Clustal Omega. Mol Syst Biol  
147 7:1–6.
- 148 17. Waterhouse AM, Procter JB, Martin DMA, Clamp M, Barton GJ. 2009. Jalview Version 2-  
149 A multiple sequence alignment editor and analysis workbench. Bioinformatics 25:1189–  
150 1191.
- 151 18. Yang J, Yan R, Roy A, Xu D, Poisson J, Zhang Y. 2014. The I-TASSER suite: protein  
152 structure and function prediction. Nat Methods 12:7–8.
- 153 19. Pakhomova S, Rife CL, Armstrong RN, Newcomer ME. 2004. Structure of fosfomycin  
154 resistance protein FosA from transposon *Tn2921*. Protein Sci 13:1260–1265.
- 155 20. Schrödinger LLC. The PyMOL molecular graphics system, version 2.2.3.
- 156 21. Mathur P, Veeraraghavan B, Devanga Ragupathi NK, Inbanathan FY, Khurana S,  
157 Bhardwaj N, Kumar S, Sagar S, Gupta A. 2018. Multiple mutations in lipid-A modification  
158 pathway & novel *fosA* variants in colistin-resistant *Klebsiella pneumoniae*. Futur Sci OA  
159 4:FSO319.
- 160
- 161

162 **Table S1.** Resistance genes and plasmids in *E. coli* urinary isolates.

| <b>Strain</b>           | <b>MLST</b>         | <b>Resistance genes</b>                                                                                                                                                                                       | <b>Plasmids</b>                                                       |
|-------------------------|---------------------|---------------------------------------------------------------------------------------------------------------------------------------------------------------------------------------------------------------|-----------------------------------------------------------------------|
| <i>E. coli</i> EC623771 | ST-131              | <i>aac(3)-Ild</i> , <i>blaCTX-M-65</i> ,<br><i>blaTEM-1B</i> , <i>fosA3</i>                                                                                                                                   | IncFIA, IncFIB, IncFII,<br>IncN                                       |
| <i>E. coli</i> EC623772 | ST-354 <sup>a</sup> | <i>aac(3)-Ild</i> , <i>aph(3'')-Ib</i> , <i>aph(6)-</i><br><i>Id</i> , <i>blaCMY-2</i> , <i>qnrB19</i> , <i>sul2</i> ,<br><i>tet(A)</i> , <i>fosA7.5</i>                                                      | Col(pHAD28), IncC,<br>IncFIA, IncFIB                                  |
| <i>E. coli</i> EC623773 | ST-457              | <i>aac(3)-Ild</i> , <i>aadA1</i> , <i>aadA2</i> ,<br><i>aph(3'')-Ib</i> , <i>aph(6)-Id</i> ,<br><i>blaTEM-1B</i> , <i>cmlA1</i> , <i>dfrA12</i> ,<br><i>floR</i> , <i>sul2</i> , <i>tet(A)</i> , <i>fosA8</i> | Col(MG828), Col8282,<br>ColpVC, IncFIB, IncFII,<br>IncN, IncX1, p0111 |

163 <sup>a</sup>Not in PubMLST Achtman Database, novel ST within the ST-354 clonal complex

164 Abbreviations: MLST; Multi-locus sequence typing

165

**Table S2.** Accession numbers for FosA proteins analyzed in this study.

| <b>FosA Allele</b>      | <b>Source</b>                      | <b>Protein Sequence ID</b> |
|-------------------------|------------------------------------|----------------------------|
| FosA1                   | <i>Serratia marcescens</i>         | WP_038415208.1             |
| FosA2                   | <i>Enterobacter cloacae</i>        | WP_025205684.1             |
| FosA3                   | <i>Escherichia coli</i>            | WP_014839980.1             |
| FosA3                   | <i>Escherichia coli</i> (EC623771) | [This Study]               |
| FosA4                   | <i>Escherichia coli</i>            | WP_034169466.1             |
| FosA5                   | <i>Klebsiella pneumoniae</i>       | WP_012579083.1             |
| FosA6                   | <i>Escherichia coli</i>            | WP_069174570.1             |
| FosA7                   | <i>Salmonella enterica</i>         | WP_000941934.1             |
| FosA7.2                 | <i>Salmonella enterica</i>         | WP_000941935.1             |
| FosA7.3                 | <i>Salmonella enterica</i>         | WP_023231494.1             |
| FosA7.4                 | <i>Salmonella enterica</i>         | WP_023216493.1             |
| FosA7.6                 | <i>Salmonella enterica</i>         | WP_061377147.1             |
| FosA7.7                 | <i>Salmonella enterica</i>         | WP_058653118.1             |
| FosA7.8                 | <i>Salmonella enterica</i>         | WP_079820715.1             |
| FosA7                   | <i>Salmonella enterica</i>         | WP_079825509.1             |
| FosA7                   | <i>Klebsiella aerogenes</i>        | WP_072383501.1             |
| FosA7                   | <i>Klebsiella oxytoca</i>          | WP_049094497.1             |
| FosA7                   | <i>Klebsiella pneumoniae</i>       | WP_110225974.1             |
| FosA7                   | <i>Escherichia coli</i>            | WP_097497719.1             |
| FosA7                   | <i>Citrobacter koseri</i>          | WP_058668522.1             |
| FosA7                   | <i>Citrobacter freundii</i>        | WP_071684814.1             |
| FosA7                   | <i>Citrobacter freundii</i>        | WP_087879153.1             |
| FosA8                   | <i>Leclercia adecarboxylata</i>    | WP_063277905.1             |
| FosA8                   | <i>Escherichia coli</i> (EC623773) | [This Study]               |
| FosA9                   | <i>Klebsiella variicola</i>        | WP_114473955.1             |
| FosA7 <sup>M</sup>      | <i>Klebsiella pneumoniae</i>       | [Mathur 2018] (21)         |
| FosA8 <sup>M</sup>      | <i>Klebsiella pneumoniae</i>       | WP_105321914.1             |
| FosA9 <sup>M</sup>      | <i>Klebsiella pneumoniae</i>       | WP_134874959.1             |
| FosA10 <sup>M</sup>     | <i>Klebsiella pneumoniae</i>       | WP_004177548.1             |
| FosA11 <sup>M</sup>     | <i>Klebsiella pneumoniae</i>       | WP_002887377.1             |
| FosA12 <sup>M</sup>     | <i>Klebsiella pneumoniae</i>       | WP_004146118.1             |
| FosA7.5 <sup>WT</sup>   | <i>Escherichia coli</i>            | WP_000941933.1             |
| FosA7.5 <sup>Q86E</sup> | <i>Escherichia coli</i> (EC623772) | [This Study]               |
| FosA7.5 <sup>W92G</sup> | <i>Escherichia coli</i>            | WP_094163054.1             |



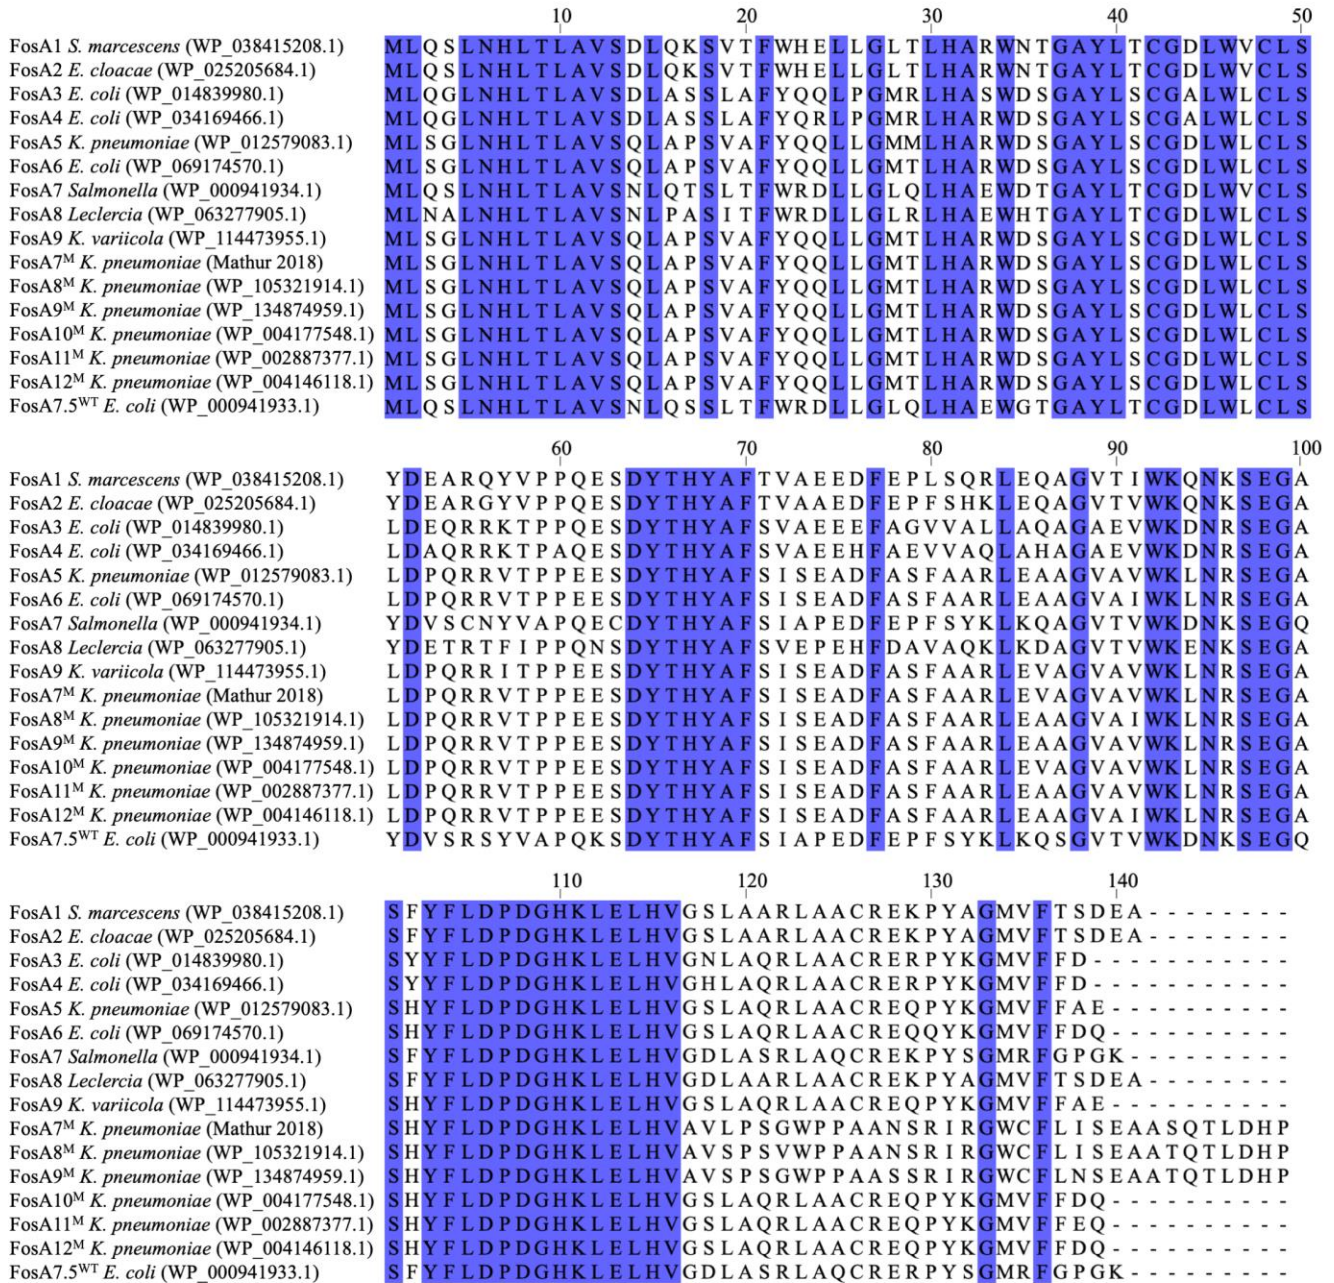

169  
170  
171  
172  
173  
174  
175  
176  
177

**Figure S1.** Multiple sequence alignment of FosA1-A12 protein sequence variants. Blue colouring in the alignment indicates conserved residues identified amongst FosA1–12 family members. The alignment was generated using Jalview version 2.10.5 (17).

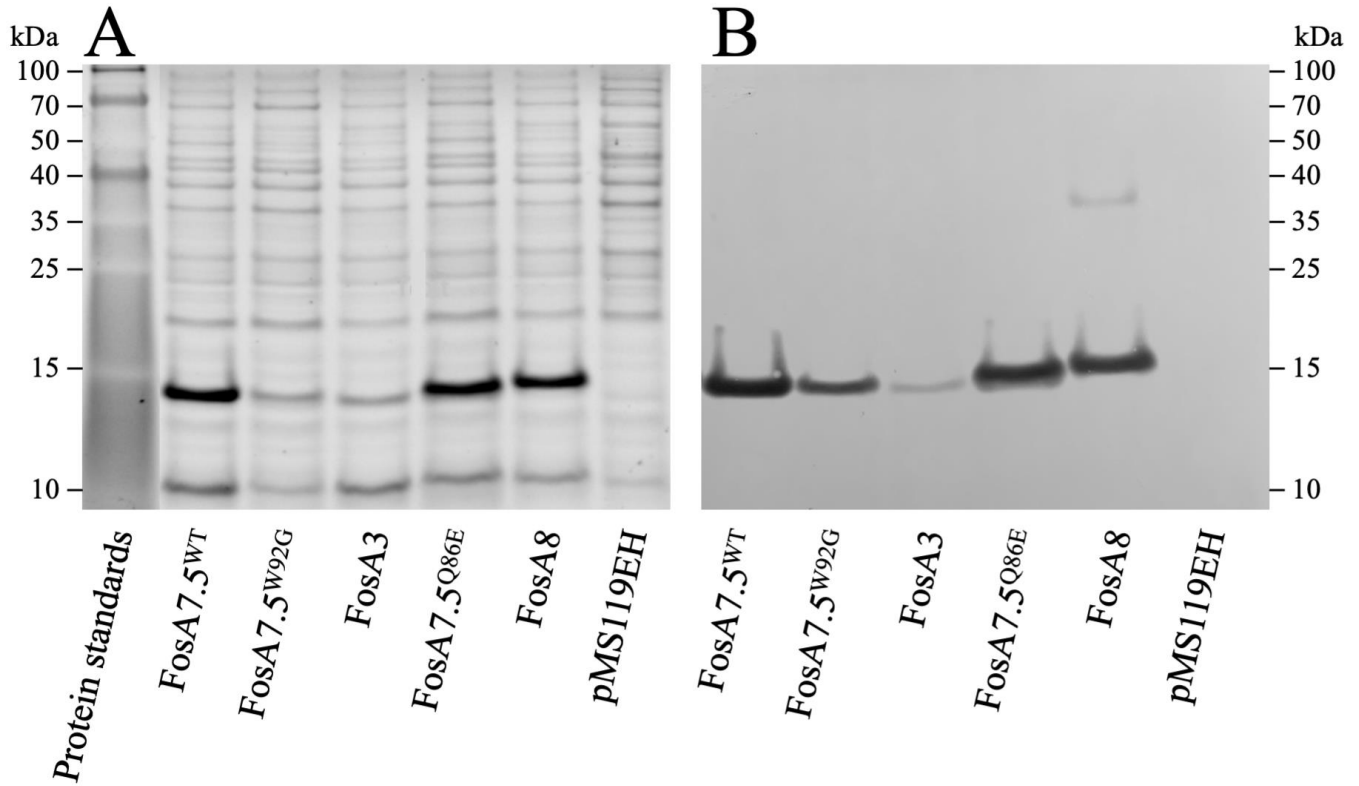

178  
179  
180  
181  
182  
183  
184  
185

**Figure S2.** Induction of FosA proteins in *E. coli* transformants. A) TCE-visualized protein extracts. Proteins were fractionated on a 12% SDS-PAGE gel containing 0.5% TCE and visualized under ultraviolet light (8). B) Western blot of protein extracts (9). Proteins were detected using a His probe-HRP-conjugated antibody and the HRP conjugate substrate kit (Bio-Rad).

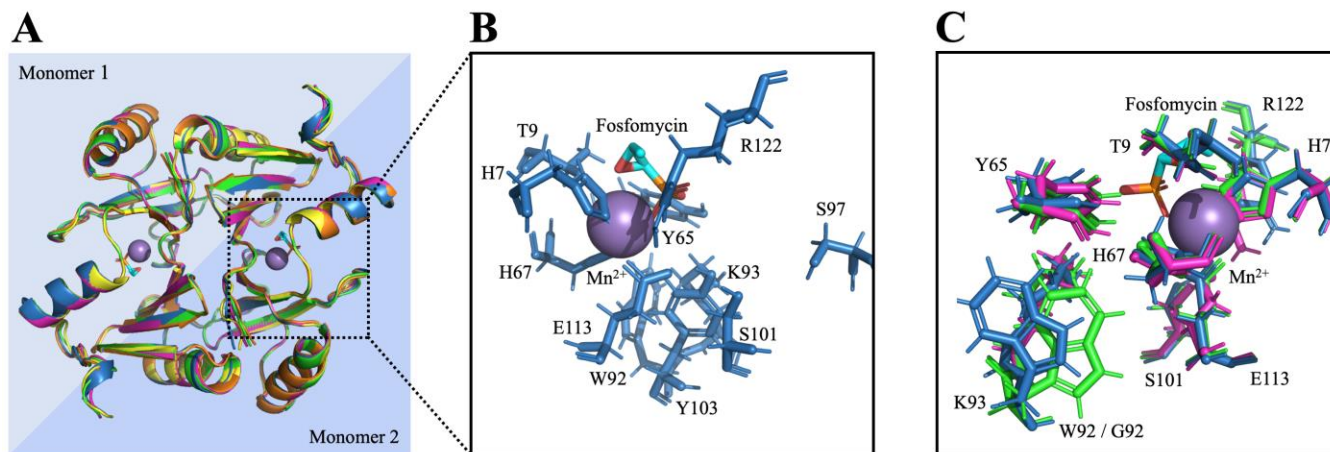

- FosA7.5<sup>WT</sup> *E. coli* (WP\_000941933.1)      ■ FosA3 *E. coli* (EC623771)
- FosA7.5<sup>Q86E</sup> *E. coli* (EC623772)      ■ FosA8 *E. coli* (EC623773)
- FosA7.5<sup>W92G</sup> *E. coli* (WP\_094163054.1)

186  
187  
188  
189  
190  
191  
192  
193  
194

**Figure S3.** Structural visualization of FosA protein homology models. **A)** An overview of aligned superimposed FosA protein dimers are shown where a bound fosfomycin and  $Mn^{2+}$  ion are shown as a colored stick diagram and sphere respectively. **B)** A zoomed in stick diagram view of the active site of FosA7.5<sup>Q86E</sup> from *E. coli* EC623772. **C)** A stick diagram of superimposed active sites from FosA7.5<sup>WT</sup>, FosA7.5<sup>Q86E</sup>, and FosA7.5<sup>W92G</sup> rotated 120 degrees from panel B. These images were created using the program PyMOL version 2.2.3 (20). Colors listed below each panel correspond to FosA sequences shown in all panels.

```

195 >FosA7.5WT_E.coli_WP_000941933.1
196 gaattcaggagaaataatATGCTTCAATCTCTGAACCACTTAACGCTTGCTGTCAGTAATTTGCAAAGT
197   AGCCTGACATTCTGGCGCGATTTGCTGGGGTTGCAGTTACATGCTGAGTGGGGTACAGGTGCTTA
198   CCTTACCTGTGGTGACCTTTGGCTCTGTCTTTCTTATGACGTATCCCGTAGCTACGTGGCCCCAC
199   AGAAAAGTGACTATAACCCATTACGCATTACAGCATTGCGCCAGAAGATTTTGAGCCGTTCTCATAT
200   AAGCTGAAACAGTCGGGAGTGACGGTCTGGAAAGACAATAAAAGCGAAGGGCAATCTTTCTATTT
201   TCTTGACCCGGATGGCCACAAGCTGGAGCTGCATGTGGGAGATTTAGCATCTCGACTGGCGCAGT
202   GCCGGGAGAGGCCTTACTCTGGAATGCGTTTTGGTCCTGGTAAAggcggctctcatcatcatcat
203   catcattctTAAtctaga
204 >FosA7.5Q86E_E.coli_EC623772
205 gaattcaggagaaataatATGCTTCAATCTCTGAACCACTTAACGCTTGCTGTCAGTAATTTGCAAAGT
206   AGCCTGACATTCTGGCGCGATTTGCTGGGGTTGCAGTTACATGCTGAGTGGGGTACAGGTGCTTA
207   CCTTACCTGTGGTGACCTTTGGCTCTGTCTTTCTTATGACGTATCCCGTAGCTACGTGGCCCCAC
208   AGAAAAGTGACTATAACCCATTACGCATTACAGCATTGCGCCAGAAGATTTTGAGCCGTTCTCATAT
209   AAGCTGAAAGAGTCGGGAGTGACGGTCTGGAAAGACAATAAAAGCGAAGGGCAATCTTTCTATTT
210   TCTTGACCCGGATGGCCACAAGCTGGAGCTGCATGTGGGAGATTTAGCATCTCGACTGGCGCAGT
211   GCCGGGAGAGGCCTTACTCTGGAATGCGTTTTGGTCCTGGTAAAggcggctctcatcatcatcat
212   catcattctTAAtctaga
213 >FosA7.5W92G_E.coli_WP_094163054.1
214 gaattcaggagaaataatATGCTTCAATCTCTGAACCACTTAACGCTTGCTGTCAGTAATTTGCAAAGT
215   AGCCTGACATTCTGGCGCGATTTGCTGGGGTTGCAGTTACATGCTGAGTGGGGTACAGGTGCTTA
216   CCTTACCTGTGGTGACCTTTGGCTCTGTCTTTCTTATGACGTATCCCGTAGCTACGTGGCCCCAC
217   AGAAAAGTGACTATAACCCATTACGCATTACAGCATTGCGCCAGAAGATTTTGAGCCGTTCTCATAT
218   AAGCTGAAACAGTCGGGAGTGACGGTCGGGAAAGACAATAAAAGCGAAGGGCAATCTTTCTATTT
219   TCTTGACCCGGATGGCCACAAGCTGGAGCTGCATGTGGGAGATTTAGCATCTCGACTGGCGCAGT
220   GCCGGGAGAGGCCTTACTCTGGAATGCGTTTTGGTCCTGGTAAAggcggctctcatcatcatcat
221   catcattctTAAtctaga
222 >FosA3_E.coli_EC623771
223 gaattcaggagaaataatATGCTGCAGGGATTGAATCATCTGACGCTGGCGGTTCAGCGATCTGGCGTCA
224   AGCCTGGCATTCTTATCAGCAGTTACCTGGAATGCGCCTGCACGCCAGCTGGGATAGCGGAGCCTA
225   TCTCTCCTGTGGGGCGCTGTGGCTGTGCTTGTGCTGGATGAGCAGCGGCGTAAAACGCCCCCTC
226   AGGAAAGCGACTATAACCCACTACGCCTTCAGCGTGGCGGAAGAAGAGTTTGCCGGGGTGGTGGCT
227   CTGCTGGCGCAGGCGGGGGCTGAGGTATGGAAAGATAACCGCAGTGAAGGGGCGTCTTACTATTT
228   TCTCGACCCTGACGGCCATAAGCTGGAGCTGCATGTGGGGAATCTGGCGCAGCGGCTGGCCGCCT
229   GTCGCGAACGCCCTACAAGGGGATGGTCTTTTTTGTATggcggctctcatcatcatcatcatcat
230   tctTGAtctaga
231 >FosA8_E.coli_EC623773
232 gaattcaggagaaataatATGCTTAAACGCCCTTAACCATCTGACCCTTGCTGTCAGCAACTTGCCCTGCC
233   AGCATCACTTTCTGGCGCGATCTTCTTGGCCTGCGCCTGCACGCCGAATGGCACACCGGAGCTTA
234   CCTTACCTGTGGCGATCTCTGGCTCTGCCTGTCTTATGACGAGACGCGGACATTCATCCCACCAC
235   AGAACAGCGATTACACCCACTACGCCTTTTCTGTTGAACCGGAACACTTTGACGCCGTCGCGCAA
236   AAGCTCAAAGACGCTGGCGTAACGGTCTGGAAAGAGAACAAAAGCGAAGGGGCGTCTGTTCTATTT
237   TCTCGACCCGGACGGGCACAACTGGAATGCATGTGGGCGATCTGGCCGCGCGTCTGGCGGCGT
238   GTCGGGAGAAGCCTTACGCGGGAATGGTTTTTACGTCAGATGAAGCGggcggctctcatcatcat
239   catcatcattctTAAtctaga
240
241

```

**Figure S4.** Fasta files for BioBasic gene synthesis. Lowercase letters indicate restriction sites

242 and hexahistidine tags.
